# Supplementary material for: Potential Role of Seven Proteomics Tissue Biomarkers for Diagnosis and Prognosis of Prostate Cancer in Urine
Source: Diagnostics (Basel). 2022 Dec 16;12(12):3184. doi: 10.3390/diagnostics12123184 (PMC9777474; doi:10.3390/diagnostics12123184)
Supplement: Supplementary file 1 [file diagnostics-12-03184-s001.zip › Supplementary Table S1_final.xlsx]

## Sheet: Supplementary Table 1
Supplementary Table S1: Age, clinical and histopathology information of the patients included in the study
Sample No.	Group	Sample Code	Age	PSA (ng/ml)	Creatinine urine (mmol/L)	PCa positive biopsy cores	Total number of biopsy cores	Hystopathology diagnosis	Т	N	М	Gleason score	Stage
1	Control	PC-154	68	10.5	17.61	/	/	BPH	\	\	\	\	\
2	Control	PC-161	65	4.7	27.99	/	/	BPH	\	\	\	\	\
3	Control	PC-165	74	11.96	9.79	/	/	BPH	\	\	\	\	\
4	Control	PC-173	82	5.27	10.98	/	/	BPH	\	\	\	\	\
5	Control	PC-175	62	9.87	6.21	/	/	BPH	\	\	\	\	\
6	Control	PC-183	79	10.6	10.03	/	/	BPH	\	\	\	\	\
7	Control	PC-184	57	5.62	14.52	/	/	BPH	\	\	\	\	\
8	Control	PC-188	68	7.63	13.63	/	/	BPH	\	\	\	\	\
9	Control	PC-190	70	24	19.43	/	/	BPH	\	\	\	\	\
10	Control	PC-194	71	5.3	14.42	/	/	BPH	\	\	\	\	\
11	Control	PC-195	64	10	20.38	/	/	BPH	\	\	\	\	\
12	Control	PC-197	68	9.37	27.44	/	/	BPH	\	\	\	\	\
13	Control	PC-201	70	5	13.16	/	/	BPH	\	\	\	\	\
14	Control	PC-202	67	6.3	13.69	/	/	BPH	\	\	\	\	\
15	Control	PC-204	77	13	8.8	/	/	BPH	\	\	\	\	\
16	Control	PC-222	61	5.68	13.12	/	/	BPH	\	\	\	\	\
17	Control	PC-248	69	5.4	14.3	/	/	BPH	\	\	\	\	\
18	GS6	PC-60	71	10.8	13.2	5	10	Adenocarcinoma prostatae	T3a	N0	Mx	3+3	III
19	GS6	PC-63	67	11.3	14.08	2	10	Adenocarcinoma prostatae	T2c	N0	Mx	3+3	IIB
20	GS6	PC-121	68	38.5	16.4	2	10	Adenocarcinoma prostatae	T2c	Nx	Mx	3+3	IIB
21	GS6	PC-157	54	10	22	1	12	Adenocarcinoma prostatae	Т2	N0	M0	3+3	I
22	GS6	PC-166	70	8.93	10.43	5	10	Adenocarcinoma prostatae	T3a	Nx	Mx	3+3	III
23	GS6	PC-189	61	16.1	18.99	6	10	Adenocarcinoma prostatae	T3a	Nx	Mx	3+3	III
24	GS6	PC-199	56	7.37	27.76	5	10	Adenocarcinoma prostatae	Т2c	Nx	Mx	3+3	II
25	GS6	PC-209	73	5.89	15.2	2	10	Adenocarcinoma prostatae	Т2c	Nx	Mx	3+3	II
26	GS6	PC-215	64	4.14	13.18	1	10	Adenocarcinoma prostatae	Т2c	Nx	Mx	3+3	II
27	GS6	PC-216	76	8.01	17.57	3	10	Adenocarcinoma prostatae	Т3а	Nx	Mx	3+3	III
28	GS6	PC-237	71	4.5	15.61	2	10	Adenocarcinoma prostatae	Т2c	Nx	Mx	3+3	II
29	GS6	PC-261	71	7.6	21.59	2	10	Adenocarcinoma prostatae	T2c	Nx	Mx	3+3	II
30	GS6	PC-265	63	6.4	24.67	2	10	Adenocarcinoma prostatae	T2c	Nx	Mx	3+3	II
31	GS6	PC-277	65	3.8	17	2	10	Adenocarcinoma prostatae	T2c	Nx	Mx	3+3	II
32	GS6	PC-293	69	13.4	27.67	2	10	Adenocarcinoma prostatae	T2c	N0	Mx	3+3	II
33	GS6	PC-301	69	5.86	22.07	4	12	Adenocarcinoma prostatae	T2c	Nx	Mx	3+3	II
34	GS6	PC-308	66	2.48	13.65	1	10	Adenocarcinoma prostatae	T2c	Nx	Mx	3+3	II
35	GS7	PC-53	73	13	8.83	5	10	Adenocarcinoma prostatae	T3b	N0	Mx	3+4	III
36	GS7	PC-56	62	11.4	6.47	6	10	Adenocarcinoma prostatae	T3a	N0	Mx	3+4	III
37	GS7	PC-75	71	15.1	7.31	3	10	Adenocarcinoma prostatae	T3a	Nx	Mx	3+4	III
38	GS7	PC-88	67	7.43	14.99	3	12	Adenocarcinoma prostatae	T2c	Nx	Mx	3+4	IIC
39	GS7	PC-93	76	58	22.8	4	10	Adenocarcinoma prostatae	T3b	N0	Mx	3+4	IIIB
40	GS7	PC-112	65	16.3	17.14	2	10	Adenocarcinoma prostatae	T2c	N0	Mx	3+4	IIB
41	GS7	PC-162	59	10.48	22.64	1	12	Adenocarcinoma prostatae	Т2c	Nx	Mx	3+4	II
42	GS7	PC-164	74	42	21.84	3	10	Adenocarcinoma prostatae	T2c	N0	Mx	4+5	IIB
43	GS7	PC-187	63	6.79	9.44	10	10	Adenocarcinoma prostatae	T3b	Nx	Mx	3+4	III
44	GS7	PC-198	63	11	15.6	12	12	Adenocarcinoma prostatae	T4b	N0	Mx	3+4	III
45	GS7	PC-246	71	8	15.7	4	10	Adenocarcinoma prostatae	T3a	Nx	Mx	3+4	III
46	GS7	PC-250	69	15	15.6	1	10	Adenocarcinoma prostatae	T2c	N0	Mx	3+4	II
47	GS7	PC-297	70	1.77	20.9	1	10	Adenocarcinoma prostatae	T2c	Nx	Mx	3+4	II
48	GS7	PC-324	63	23	15.87	4	10	Adenocarcinoma prostate	T3b	N0	M0	3+4	IIIB
49	GS7	PC-333	68	15.87	24.44	5	10	Adenocarcinoma prostate	T3a	N0	M0	4+3	III
50	GS7	PC-351	66	7.7	21.73	2	10	Adenocarcinoma prostatae	T2c	N0	M0	4+3	II
51	GS7	PC-357	69	8.88	37.23	3	10	Adenocarcinoma prostate	T3a	Nx	Mx	3+4	III
52	GS7	PC-364	69	12	25.74	10	10	Adenocarcinoma prostatae	T3b	N0	Mx	4+3	III
53	GS8	PC-48	65	32.3	21.44	5	10	Adenocarcinoma prostatae	T3b	Nx	Mx	4+4	III
54	GS8	PC-76	70	19.9	8.88	4	10	Adenocarcinoma prostatae	T4	N0	Mx	4+4	IV
55	GS8	PC-159	68	10	28.93	1	12	Adenocarcinoma prostatae	T3b	N0	Mx	4+4+3	III
56	GS8	PC-272	72	14.7	19.96	1	10	Adenocarcinoma prostatae	Т3b	N0	Mx	3+5	III
57	GS8	PC-346	68	19.3	19.19	3	10	Adenocarcinoma prostatae	T3b	N1	Mx	4+4	IV
58	GS8	PC-170	58	11.1	22.58	2	10	Adenocarcinoma prostatae	T3b	Nx	Mx	4+4	III
59	GS8	PC-269	71	17	25.15	3	10	Adenocarcinoma prostatae	T4	N0	Mx	4+4	III
60	GS8	PC-335	66	46	22.2	4	10	Adenocarcinoma prostatae	T4	N0	Mx	4+4	III
61	GS8	PC-336	57	100	6.76	10	10	Adenocarcinoma prostatae	T3b	Nx	Mx	4+4	III
62	GS8	PC-338	74	38	18.58	4	10	Adenocarcinoma prostatae	T3b	Nx	Mx	4+4	III
63	GS8	PC-339	64	18	28.3	4	10	Adenocarcinoma prostatae	T4	N0	Mx	4+4	III
64	GS8	PC-341	75	47.9	15.25	10	10	Adenocarcinoma prostatae	T3b	Nx	Mx	4+4	III
65	GS8	PC-350	81	8	7.87	2	10	Adenocarcinoma prostatae	T3b	Nx	Mx	4+4	III
66	GS8	PC-396	82	47	11.3	9	12	Adenocarcinoma prostatae	T3b	Nx	Mx	4+4	III
67	GS8	PC-399	70	5	17.3	5	10	Adenocarcinoma prostatae	T4	N0	Mx	4+4	III
68	GS9	PC-31	65	57	13.51	8	10	Adenocarcinoma prostatae	T3b	N1	Mx	3+4+5	IV
69	GS9	PC-39	64	50	19.62	10	10	Adenocarcinoma prostatae	T2b	N1	Mx	4+5	IV
70	GS9	PC-71	66	12	17.256	9	10	Adenocarcinoma prostatae	T4	Nx	Mx	4+5	IV
71	GS9	PC-72	58	17	10.79	10	10	Adenocarcinoma prostatae	T4	N1	Mx	4+5	IV
72	GS9	PC-105	73	5.18	8.7	8	10	Adenocarcinoma prostatae	T4	N1	Mx	4+5	IV
73	GS9	PC-124	68	67	17.5	10	10	Adenocarcinoma prostatae	T3b	N0	Mx	5+4	III
74	GS9	PC-168	65	90	11.93	10	12	Adenocarcinoma prostatae	T4	N1	Mx	4+3+5	IV
75	GS9	PC-178	58	150	12.5	2	10	Adenocarcinoma prostatae	T2b	N1	Mx	5+4	IV
76	GS9	PC-186	69	18.7	7.39	7	10	Adenocarcinoma prostatae	T3b	N0	Mx	4+5+3	III
77	GS9	PC-208	71	300	6.92	6	6	Adenocarcinoma prostatae	T4	N1	Mx	4+5	IV
78	GS9	PC-228	63	150	12.5	7	7	Adenocarcinoma prostatae	T3b	N1	Mx	3+4+5	IV
79	GS9	PC-281	71	11.06	21.3	10	10	Adenocarcinoma prostatae	T3b	N1	Mx	5+5	IV
80	GS9	PC-244	65	100	16.8	4	4	Adenocarcinoma prostatae	T3b	N1	Mx	4+5	IV
81	GS9	PC-264	84	66	9.49	9	10	Adenocarcinoma prostatae	T4	Nx	Mx	4+5	III
82	GS9	PC-273	74	100	14.42	12	12	Adenocarcinoma prostatae	T4	N1	Mx	4+5	IV
83	GS9	PC-274	70	129	4.64	12	12	Adenocarcinoma prostatae	T4	N1	Mx	4+5	IV
84	GS9	PC-276	67	89.8	14.6	12	12	Adenocarcinoma prostatae	T4	N1	Mx	4+5	IV
85	GS9	PC-385	67	29	7.59	10	10	Adenocarcinoma prostatae	T3b	Nx	Mx	4+5	IV
